# Supplementary material for: Differences in Uveal Melanoma Age-Standardized Incidence Rates in Two Eastern States of Australia Are Driven by Differences in Rurality and Ultraviolet Radiation
Source: MDPI journal article supplement (doi:10.3390/cancers13235894), 2021-11-23
Supplement: s1 [file s1]

## Supplementary Tables

**Supplementary Table S1.** UM IRR <sup>1</sup> controlling for latitude in QLD and VIC from 2001 to 2013

| Demographic                |               | IRR  | 95% CI    | <i>p</i> -Value |
|----------------------------|---------------|------|-----------|-----------------|
| Age                        | <55 years old | 1.00 | -         | <0.001          |
|                            | >55 years old | 5.40 | 4.67–6.26 |                 |
| Sex                        | Female        | 1.00 | -         | 0.018           |
|                            | Male          | 1.18 | 1.03–1.34 |                 |
| Latitude Band <sup>3</sup> | VIC           | 1.00 | 0         | 0.056           |
|                            | QLD band 1    | 1.16 | 1.00–1.35 |                 |
|                            | QLD band 2    | 1.74 | 1.40–2.15 |                 |
|                            | QLD band 3    | 1.01 | 0.74–1.33 |                 |

<sup>1</sup> IRR, Incidence Rate Ratio, computed using per-sex, per-age-group, per-year population. <sup>2</sup> VIC, latitude –39.1° to –34.0°; QLD band 1, latitude –29.0° to –26.7°; QLD band 2, latitude –26.7° to –21.6°; QLD band 3, latitude –21.6° to –9.8°.

**Supplementary Table S2.** UM IRR <sup>1</sup> controlling for remoteness in QLD and VIC from 2001 to 2013.

| Demographic             |               | IRR  | 95% CI    | <i>p</i> -Value |
|-------------------------|---------------|------|-----------|-----------------|
| Remoteness <sup>2</sup> | Major City    | 1.00 | -         | 0.002           |
|                         | Rural         | 1.24 | 1.08–1.43 |                 |
| State                   | VIC           | 1.00 | -         | 0.005           |
|                         | QLD           | 1.21 | 1.06–1.39 |                 |
| Sex                     | Female        | 1.00 | -         | 0.020           |
|                         | Male          | 1.17 | 1.03–1.34 |                 |
| Age                     | <55 years old | 1.00 | -         | <0.001          |
|                         | >55 years old | 5.40 | 4.67–6.26 |                 |

<sup>1</sup> IRR, Incidence Rate Ratio, computed using per-sex, per-age-group, per-year population. <sup>2</sup> Major City, RA < 1.5; Rural, RA 1.5–5.
